# Supplementary material for: Risk of Introduction of Infectious Animal Diseases for Europe Based on the Health Situation of North Africa and the Arabian Peninsula
Source: Front Vet Sci. 2019 Sep 4;6:293. doi: 10.3389/fvets.2019.00293 (PMC6737002; doi:10.3389/fvets.2019.00293)
Supplement: Supplementary file 2 [file Data_Sheet_2.xlsx]

## Sheet: Sheet 1
Country	Year	Disease	Outbreaks	bees	birds	cattle	buffaloes	dogs	goats	cervidae	camelidae	equidae	wild species	rabbits	sheep	swine	Total
Mali	2005	Peste des petits ruminants	2												150		150
Tunisia	2005	Equine influenza	1									4					4
Kuwait	2005	Highly path. avian influenza	1										1				1
Egypt	2006	Foot and mouth disease	31			7016	48										7064
Egypt	2006	Highly path. avian influenza	1086		32564								18				32582
Niger	2006	Highly path. avian influenza	2														0
Egypt	2006	Lumpy skin disease	15			747											747
Sudan	2006	Highly path. avian influenza	18		63400												63400
Algeria	2006	Bluetongue	29														0
Morocco	2006	Epizootic haemorrhagic disease	23			30											30
Morocco	2006	Bluetongue	10												43		43
Algeria	2006	Epizootic haemorrhagic disease	7														0
Tunisia	2006	Epizootic haemorrhagic disease	24			100											100
Tunisia	2007	Myxomatosis	2											115			115
Kuwait	2007	Highly path. avian influenza	20		47												47
Saudi Arabia	2007	Highly path. avian influenza	1		106												106
Tunisia	2007	Bluetongue	17												105		105
Sudan	2007	Rift Valley fever	2			…									…		0
Saudi Arabia	2007	Highly path. avian influenza	29		1500												1500
Egypt	2008	Foot and mouth disease	2			50											50
Bahrain	2008	Foot and mouth disease															0
United Arab Emirates	2008	West Nile Fever	1									1					1
Morocco	2008	Peste des petits ruminants	257												72		72
Egypt	2008	Equine influenza	7									57					57
Algeria	2008	Bluetongue	6												15		15
Mali	2009	Lumpy skin disease	9			11											11
Egypt	2009	Foot and mouth disease	2			4	1										5
Egypt	2009	Foot and mouth disease	6			240											240
Bahrain	2009	Foot and mouth disease	1			5											5
Kuwait	2009	Foot and mouth disease	1			60											60
Bahrain	2009	Foot and mouth disease	1			64											64
United Arab Emirates	2009	Foot and mouth disease	2										85				85
Libya	2009	Foot and mouth disease	3			150											150
Oman	2009	Bluetongue	1							6					9		15
Algeria	2009	Bluetongue	19												34		34
Morocco	2009	Bluetongue	60												23		23
Tunisia	2009	Bluetongue	5												19		19
Morocco	2009	Bluetongue	34												335		335
United Arab Emirates	2009	Contagious equine metritis	1									1					1
Tunisia	2009	Bluetongue	5												5		5
Algeria	2010	Bluetongue	2			6											6
Bahrain	2010	Glanders	3									6					6
Qatar	2010	Bluetongue	4												100		100
United Arab Emirates	2010	Equine rhinopneumonitis	1									1					1
Morocco	2010	Bluetongue	361												84		84
Morocco	2010	Bluetongue	42												20		20
Morocco	2010	West Nile Fever	24									17					17
Saudi Arabia	2010	Rift Valley fever	1			1									5		6
Algeria	2010	Bluetongue	46												39		39
Chad	2010	African swine fever	9													883	883
Mauritania	2010	Rift Valley fever	3
Libya	2011	Foot and mouth disease	2			19											19
Algeria	2011	Peste des petits ruminants	7						61						88		149
Bahrain	2011	Glanders	10									4					4
Tunisia	2011	Peste des petits ruminants	5												2		2
Algeria	2011	Bluetongue	16												15		15
Tunisia	2011	Bluetongue	39												62		62
Libya	2012	Foot and mouth disease	53			170									3500		3670
Libya	2012	Foot and mouth disease	1			11											11
Egypt	2012	Foot and mouth disease	49			373	23										396
Tunisia	2012	Enzootic abortion (chlamydiosis)	1						6								6
Tunisia	2012	Q fever	1						2								2
Algeria	2012	Peste des petits ruminants	3						17						2		19
Tunisia	2012	Peste des petits ruminants	2												58		58
Tunisia	2012	Enzootic abortion (chlamydiosis)	1												29		29
Egypt	2012	Peste des petits ruminants	4						4						384		388
Tunisia	2012	Peste des petits ruminants	24												32		32
Algeria	2013	Peste des petits ruminants	4						26						6		32
Libya	2013	Newcastle disease	1		120000												120000
Mauritania	2013	Rift Valley fever	5
Qatar	2013	MERS-CoV	3								3						3
Egypt	2013	Lumpy skin disease	12			101											101
Chad	2013	Heartwater	1								190						190
Mauritania	2014	Contagious bov. pleuropneumonia	2
Libya	2014	Highly path. avian influenza	1		19												19
Tunisia	2014	Foot and mouth disease	150			2											2
Oman	2014	MERS-CoV	5								5						5
Algeria	2014	Newcastle disease	5		416200												416200
Kuwait	2014	MERS-CoV	2								5						5
Algeria	2014	Foot and mouth disease	419			4											4
Chad	2014	African swine fever	1													96	96
Egypt	2014	Equid herpesvirus-1 (EHV-1) (Infection with)	1									4					4
Kuwait	2015	Lumpy skin disease	5			46											46
Libya	2015	Highly path. avian influenza	1		11												11
Algeria	2015	Foot and mouth disease	12			1									42		43
Niger	2015	Highly path. avian influenza	1		2440												2440
Saudi Arabia	2015	Lumpy skin disease	3			196											196
Mauritania	2015	Foot and mouth disease	1
Morocco	2015	Peste des petits ruminants	10												40		40
Tunisia	2015	Rabbit haemorrhagic disease	1											500			500
Tunisia	2015	Epizootic haemorrhagic disease	1			4											4
Saudi Arabia	2015	Foot and mouth disease	2			93									30		123
Morocco	2015	Foot and mouth disease	6			10											10
Mauritania	2015	Rift Valley fever	4
Mauritania	2015	Contagious bov. pleuropneumonia	1
Tunisia	2015	West Nile Fever	1									1					1
Saudi Arabia	2016	MERS-CoV	9								11						11
Kuwait	2016	Foot and mouth disease	12			711											711
Algeria	2016	Peste des petits ruminants	1						3						4		7
Mali	2016	African swine fever	1													130	130
Niger	2016	Highly path. avian influenza	1		86000												86000
Saudi Arabia	2016	Lumpy skin disease	5			3806											3806
Algeria	2016	Avian infectious bronchitis	3		15000												15000
Tunisia	2016	Peste des petits ruminants	24												100		100
Niger	2016	Rift Valley fever	1			39									117		156
Algeria	2016	Highly path. avian influenza	1		892												892
Saudi Arabia	2016	Foot and mouth disease	1			1020									2		1022
Egypt	2016	Highly path. avian influenza	1		2												2
Tunisia	2016	Highly path. avian influenza	1		30												30
Tunisia	2016	Bluetongue	1												1		1

## Sheet: Sheet 2
ID Country	Year	Disease	Outbreaks	birds	cattle	buffaloes	goats	cervidae	camelidae	equidae	wild species	sheep	Total
9	2005	Peste des petits ruminants	2									150	150
12	2005	Highly path. avian influenza	1								1		1
5	2006	Foot and mouth disease	31		7016	48							7064
5	2006	Highly path. avian influenza	1086	32564							18		32582
8	2006	Highly path. avian influenza	2										0
6	2006	Highly path. avian influenza	18	63400									63400
2	2006	Bluetongue	29										0
1	2006	Epizootic haemorrhagic disease	23		30								30
1	2006	Bluetongue	10									43	43
2	2006	Epizootic haemorrhagic disease	7										0
3	2006	Epizootic haemorrhagic disease	24		100								100
12	2007	Highly path. avian influenza	20	47									47
11	2007	Highly path. avian influenza	1	106									106
3	2007	Bluetongue	17									105	105
6	2007	Rift Valley fever	2		…							…	0
11	2007	Highly path. avian influenza	29	1500									1500
5	2008	Foot and mouth disease	2		50								50
13	2008	Foot and mouth disease											0
1	2008	Peste des petits ruminants	257									72	72
2	2008	Bluetongue	6									15	15
5	2009	Foot and mouth disease	2		4	1							5
5	2009	Foot and mouth disease	6		240								240
13	2009	Foot and mouth disease	1		5								5
12	2009	Foot and mouth disease	1		60								60
13	2009	Foot and mouth disease	1		64								64
15	2009	Foot and mouth disease	2								85		85
4	2009	Foot and mouth disease	3		150								150
16	2009	Bluetongue	1					6				9	15
2	2009	Bluetongue	19									34	34
1	2009	Bluetongue	60									23	23
3	2009	Bluetongue	5									19	19
1	2009	Bluetongue	34									335	335
3	2009	Bluetongue	5									5	5
2	2010	Bluetongue	2		6								6
13	2010	Glanders	3							6			6
14	2010	Bluetongue	4									100	100
1	2010	Bluetongue	361									84	84
1	2010	Bluetongue	42									20	20
11	2010	Rift Valley fever	1		1							5	6
2	2010	Bluetongue	46									39	39
10	2010	Rift Valley fever	3
4	2011	Foot and mouth disease	2		19								19
2	2011	Peste des petits ruminants	7				61					88	149
13	2011	Glanders	10							4			4
3	2011	Peste des petits ruminants	5									2	2
2	2011	Bluetongue	16									15	15
3	2011	Bluetongue	39									62	62
4	2012	Foot and mouth disease	53		170							3500	3670
4	2012	Foot and mouth disease	1		11								11
5	2012	Foot and mouth disease	49		373	23							396
2	2012	Peste des petits ruminants	3				17					2	19
3	2012	Peste des petits ruminants	2									58	58
5	2012	Peste des petits ruminants	4				4					384	388
3	2012	Peste des petits ruminants	24									32	32
2	2013	Peste des petits ruminants	4				26					6	32
4	2013	Newcastle disease	1	120000									120000
10	2013	Rift Valley fever	5
14	2013	MERS-CoV	3						3				3
7	2013	Heartwater	1						190				190
10	2014	Contagious bov. pleuropneumonia	2
4	2014	Highly path. avian influenza	1	19									19
3	2014	Foot and mouth disease	150		2								2
16	2014	MERS-CoV	5						5				5
2	2014	Newcastle disease	5	416200									416200
12	2014	MERS-CoV	2						5				5
2	2014	Foot and mouth disease	419		4								4
4	2015	Highly path. avian influenza	1	11									11
2	2015	Foot and mouth disease	12		1							42	43
8	2015	Highly path. avian influenza	1	2440									2440
10	2015	Foot and mouth disease	1
1	2015	Peste des petits ruminants	10									40	40
3	2015	Epizootic haemorrhagic disease	1		4								4
11	2015	Foot and mouth disease	2		93							30	123
1	2015	Foot and mouth disease	6		10								10
10	2015	Rift Valley fever	4
10	2015	Contagious bov. pleuropneumonia	1
11	2016	MERS-CoV	9						11				11
12	2016	Foot and mouth disease	12		711								711
2	2016	Peste des petits ruminants	1				3					4	7
8	2016	Highly path. avian influenza	1	86000									86000
3	2016	Peste des petits ruminants	24									100	100
8	2016	Rift Valley fever	1		39							117	156
2	2016	Highly path. avian influenza	1	892									892
11	2016	Foot and mouth disease	1		1020							2	1022
5	2016	Highly path. avian influenza	1	2									2
3	2016	Highly path. avian influenza	1	30									30
3	2016	Bluetongue	1									1	1
